# Supplementary material for: Gamma Radiation Induced In-Vitro Mutagenesis and Isolation of Mutants for Early Flowering and Phytomorphological Variations in Dendrobium ‘Emma White’
Source: MDPI journal article supplement (doi:10.3390/plants11223168), 2022-11-18
Supplement: s1 [file s1]

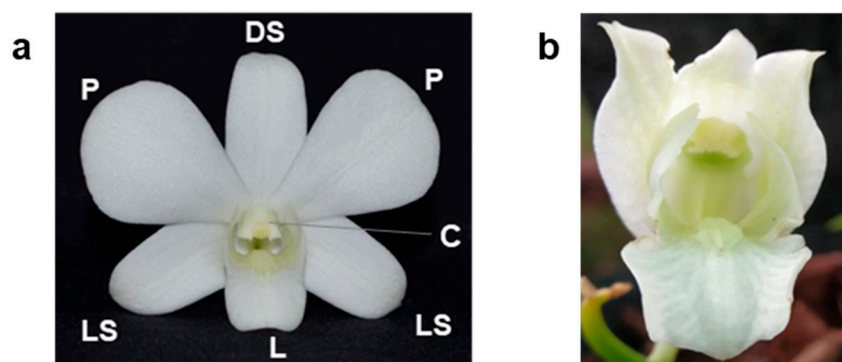

**Supplementary Figure S1.** Comparison of early flower mutant recovered from irradiated protocorm-like bodies (PLBs) at dose 10 Gy with the flower of 'Emma White' mother plant. Early flowering mutant 10/46 (b) flowered within 294 days of ex vitro growth and was observed with alterations in the floral structure as the dorsal and the lateral sepals fused with no petals. The lip of the mutant flower appeared slightly rounded with wavy edges and longer side lobes compared to the flower of mother plant (a) of *Dendrobium* 'Emma White' with two petals (P), one dorsal sepal (DS), two lateral sepals (LS), lip (L) and column (C). The mutant plant was numbered according to the radiation dose followed by plant number, i.e., 10 Gy followed by plant number 46 (10/46).

**Supplementary Table S1.** Mean nuclear DNA intensity and nuclei count of gamma-irradiated protocorm-like bodies (PLBs) after five months of irradiation treatment. The isolated nuclei pellets of irradiated PLBs were resuspended in propidium iodide (PI) staining buffer overnight at 4°C in dark conditions. 200 µl of stained nuclei solution was pipetted into a flat bottom corning 96-well plate and centrifuged at 3000 rpm for 6 minutes. PI is a DNA-intercalating fluorescent dye, and its binding with DNA is stoichiometric. Therefore, nuclear DNA content per cell stained with PI is proportional to their FL-3 fluorescence intensity (488 nm excitation and 620±30 nm emission). Mean DNA intensity and percentage of nuclei count at the S+G2M phase of cell cycle were analyzed using high-throughput Cell analyzer (HTCA), and flow data were analyzed using acumen Cellista software. The unirradiated PLBs were taken as control.

| Dose    | Mean DNA intensity | Nuclei count (%) |
|---------|--------------------|------------------|
| Control | 1893.58 ± 33.43 a  | 45.64 ± 2.69 ab  |
| 10      | 1914.50 ± 37.92 a  | 46.53 ± 3.00 a   |
| 20      | 1824.17 ± 25.04 ab | 39.26 ± 1.43 bc  |
| 40      | 1767.50 ± 38.78 bc | 38.34 ± 2.80 c   |
| 60      | 1716.58 ± 20.90 c  | 34.83 ± 2.39 c   |
| 80      | 1601.92 ± 28.38 d  | 22.09 ± 1.07 d   |

**Supplementary Table S2.** Random amplified polymorphic DNA primers used for genetic study of gamma-irradiated mutants of *Dendrobium* 'Emma White'

| Primer code | Sequence (5'- 3') | G+C Content (%) | Tm (°C) |
|-------------|-------------------|-----------------|---------|
| OPF 01      | ACGGATCCTG        | 60              | 42      |
| OPF 02      | GAGGATCCCT        | 60              | 33.7    |
| OPF 03      | CCTGATCACC        | 60              | 38.8    |
| OPF 04      | GGTGATCAGG        | 60              | 36      |
| OPF 05      | CCGAATTCCC        | 60              | 36      |
| OPF 06      | GGGAATTCCC        | 60              | 40.8    |
| OPD 03      | GTCGCCGTCA        | 70              | 58      |
| OPB 18      | CCACAGCAGT        | 60              | 48.4    |

---

|         |            |    |      |
|---------|------------|----|------|
| OPA 1   | CAGGCCCTTC | 70 | 48.8 |
| OPD 11  | AGCGCCATTG | 60 | 50.3 |
| OPAW 17 | TGCTGCTGCC | 70 | 52.7 |
| OPAW 13 | CTACGATGCC | 60 | 43.4 |
| OPD 01  | ACCGCGAGGG | 80 | 55.8 |
| OPG 15  | ACTGGGACTC | 60 | 45.5 |
| OPG 03  | GAGCCCTCCA | 70 | 51   |
| OPG 13  | CTCTCCGCCA | 70 | 50.3 |
| OPG 14  | GGATGAGACC | 60 | 41.8 |
| OPB 05  | TGCGCCCTTC | 70 | 52.7 |
| OPB 12  | CCTTGACGCA | 60 | 43.4 |
| OPB 17  | AGGGAACGAG | 60 | 45.4 |
| OPB 08  | GTCCACACGG | 70 | 48.4 |
| OPB 11  | GTAGACCCGT | 60 | 45.5 |
| OPB 14  | TCCGCTCTGG | 70 | 50.3 |
| OPA 04  | AATCGGGCTG | 60 | 43.4 |
| OPZ 04  | AGGCTGTGCT | 60 | 50.3 |
| OPU 3   | CTATGCCGAC | 60 | 43.4 |
| OPU 10  | ACCTCGGCAC | 60 | 51   |
| OPU 13  | GGCTGGTTCC | 70 | 48.4 |

---
